# Supplementary material for: Clinical observations and outcomes of dengue-associated retinopathy at a tertiary eye hospital in Nepal
Source: Research Square preprint supplement (doi:10.21203/rs.3.rs-6122588/v1), 2025-03-24
Supplement: Supplementary file 1 [file 4c9b14fdde22d3553d6a32d3.pdf]

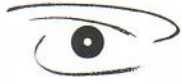

नेपाल आँखा कार्यक्रम

**Nepal Eye Program**

**Tilganga Institute of Ophthalmology**

जि. प्र. का. दर्ता नं.: १३/०८९/५०

दर्ता मिति: ०८९/८/६

स. क. प. दर्ता नं. १२५०

पान नं. ५००१३११२९

Tilganga, Kathmandu, Nepal, P.O.Box 561, Tel: 4493775, 4493684, 4499080 Fax: 977-1-4474937, Web: www.tilganga.org

23<sup>th</sup> December 2022

**Ref: 25/2022**

Dr. Eli Pradhan

Principal Investigator,

Tilganga Institute of Ophthalmology

**Subject: Approval of proposed research "Clinical manifestation and treatment outcome of Dengue associated retinopathy: a retrospective case series"**

Dear Dr. Eli,

I would like to inform you that the research titled on "Clinical manifestation and treatment outcome of Dengue associated retinopathy: a retrospective case series" was reviewed and approved by the Institutional Review Committee of Tilganga Institute of Ophthalmology (IRC-TIO) dated on 4<sup>th</sup> December 2022.

We would also like to remind you that if there are any further modifications in the approved proposal, you should be notified to IRC-TIO. Similarly, you have mandatory to submit progress report regularly. The final report must be submitted to the IRC -TIO at the end of the project.

I would like to wish you success in the forthcoming research.

.....  
Mohan Krishna Shrestha, PhD

Member Secretary,

IRC-TIO
