# Supplementary material for: Clinical observations and outcomes of dengue-associated retinopathy at a tertiary eye hospital in Nepal
Source: Research Square preprint supplement (doi:10.21203/rs.3.rs-6122588/v1), 2025-03-24
Supplement: Supplementary file 1 [file 4e1c947b88944adb21ca74e2.xlsx]

## Sheet: Data sent
SNN	SN	Eye	Age	AGE_GP	Sex	DOV_OU	Photophobia_OU	ocularpain_OU	Redness_OU	Scotoma_OU	Floaters_OU	others_OU	Fever_Durationday	Fever_maxtemp	Fever_durationbetweenfeverandocularsymptomsday	NS1Ag_positive	NS1Ag_negative	IgM_positive	IgM_negative	IgG_positive	IgG_negative	CBC_Hb	CBC_WBC	CBC_Platelets	CBC_Platelets_GP	sys	VAR00002	othersystemiccomorbidities_HTN	othersystemiccomorbidities_DM	Othersystemiccomorbidities	SPECIFY_1	UCVA_OU	VAR00004	BCDVA_OU	VAR00003	IOP_OU	KPS_OU	ACcells_OU	vitritis_OU	discedema_OU	neuroretinitis_OU	retinitis_OU	retinalvasculitis_OU	maculopathy_OU	OCT_OU	OCTA_OU	FFA_OU	observation	antiinflammatorydrops
1	1	RE	25	2	2	1	2	2	2	2	2	99	7	999	4	2	999	2	999	2	999	999	999	999	999	2	999	2	2	2	99	6/9.0	6/6 to 6/9	6/9.0	6/6 to 6/9	999	999	99	99	999.	999	999.	999.	present	cystoid changes	999	999.	99	yes
2	2	RE	26	2	1	2	2	2	2	2	2	99	999	104	7	2	999	2	999	2	999	999	999	65000	1	2	999	2	2	2	99	6/6.0	6/6 to 6/9	6/6.0	6/6 to 6/9	999	999	99	99	999.	999	999.	999.	999.	999.	999	999.	99	yes
3	3	RE	45	4	2	2	2	2	2	2	2	99	999	999	9	2	999	2	999	2	999	999	999	999	999	1	Hypertension With DM	1	1	2	99	6/6.0	6/6 to 6/9	6/6.0	6/6 to 6/9	999	999	99	99	999.	999	999.	999.	999.	999.	999	999.	99	yes
4	4	RE	30	3	1	1	2	2	2	2	2	99	3	102	12	1	999	1	999	1	999	999	999	999	999	2	999	2	2	2	99	6/24.0	<6/18 to 6/60	6/18.0	<6/9 to 6/18	999	999	99	99	999.	999	999.	999.	hemorrhages	subretinal fluid	999	999.	99	yes
5	5	RE	58	5	1	1	2	2	2	2	2	2	999	999	14	2	999	2	999	2	999	999	999	999	999	2	999	2	2	2	99	CF 5m	<3/60	6/60.0	<6/18 to 6/60	19	999	99	99	999.	999	999.	999.	hemorrhages	intraretinal edema,SRF s/o secondary CNV	999	999.	99	no
6	6	RE	67	6	2	1	2	2	2	2	2	99	999	999	999	2	999	2	999	2	999	999	999	999	999	2	999	2	2	2	99	999	999	999	999	999	999	99	99	999.	999	999.	999.	999.	999.	999	999.	99	no
7	7	RE	48	4	1	2	2	2	2	99	99	99	999	999	21	2	999	2	999	2	999	999	999	999	999	2	999	2	2	2	99	6/9.0	6/6 to 6/9	6/6.0	6/6 to 6/9	18	999	99	99	999.	999	999.	999.	999.	999.	999	999.	99	no
8	8	RE	45	4	2	1	2	2	2	2	2	2	2	102	7	2	999	2	999	2	999	999	999	999	999	2	999	2	2	2	99	6/12.0	<6/9 to 6/18	6/12.0	<6/9 to 6/18	12	999	99	99	999.	999	999.	999.	foveolitis	999.	999	normal	99	yes
9	9	RE	48	4	1	2	2	2	2	99	99	99	3	101	35	2	999	2	999	2	999	999	999	999	999	1	Hypertension With DM	1	1	2	99	6/60.0	<6/18 to 6/60	6/24.0	<6/18 to 6/60	999	999	99	99	999.	999	999.	999.	999.	999.	999	999.	99	yes
10	11	RE	26	2	1	2	2	2	2	2	2	99	3	103	999	2	999	2	999	2	999	999	999	117000	2	2	999	2	2	2	99	6/6.0	6/6 to 6/9	6/6.0	6/6 to 6/9	13	999	99	99	999.	999	999.	999.	999.	999.	999	999.	99	no
11	12	RE	26	2	2	2	2	2	2	2	2	99	999	999	7	2	999	2	999	2	999	999	999	95000	1	2	999	2	2	2	99	6/12.0	<6/9 to 6/18	6/6.0	6/6 to 6/9	999	999	99	99	999.	999	999.	999.	999.	999.	999	999.	99	yes
12	13	RE	42	4	2	1	2	2	2	2	2	99	999	999	3	2	999	2	999	2	999	999	999	999	999	2	999	2	2	2	99	6/9.0	6/6 to 6/9	6/6.0	6/6 to 6/9	999	999	99	99	999.	999	999.	999.	blot hemorrhage	999.	999	999.	99	no
13	14	RE	28	2	1	1	2	2	2	2	2	99	2	999	2	2	999	2	999	2	999	999	999	999	999	2	999	2	2	2	99	6/60.0	<6/18 to 6/60	999	999	20	999	99	99	999.	999	999.	999.	hemorrhages	999.	999	999.	99	yes
14	17	RE	34	3	1	1	2	2	2	2	2	99	4	999	3	2	999	2	999	2	999	999	999	999	999	2	999	2	2	2	99	6/36.0	<6/18 to 6/60	6/36.0	<6/18 to 6/60	999	999	99	99	999.	999	999.	999.	hemorrhages, macular edma	macular edema	999	999.	99	no
15	18	RE	65	6	1	1	2	2	2	2	1	99	999	999	999	2	999	2	999	2	999	999	999	999	999	2	999	2	2	2	99	999	999	999	999	999	999	99	99	999.	999	999.	999.	999.	999.	999	999.	99	no
16	19	RE	73	6	2	2	2	2	2	2	2	99	999	999	999	2	999	2	999	2	999	999	999	999	999	2	999	2	2	2	99	999	999	999	999	999	999	99	99	999.	999	999.	999.	999.	999.	999	999.	99	no
17	20	RE	43	4	1	1	2	2	2	2	2	99	21	999	999	2	999	2	999	2	999	999	999	999	999	1	macular dystrophy	2	2	1	BE macular dystrophy	6/24.0	<6/18 to 6/60	6/18.0	<6/9 to 6/18	999	999	99	99	999.	999	999.	999.	yes	999.	999	999.	99	no
18	21	RE	35	3	2	1	2	2	2	2	2	99	999	999	7	2	999	2	999	2	999	999	999	999	999	2	999	2	2	2	99	HM+	<3/60	HM+	<3/60	999	999	99	99	999.	999	999.	CRAO+CRVO	999.	999.	999	999.	99	no
19	22	RE	16	1	1	2	2	2	2	2	2	99	999	103	8	2	999	2	999	2	999	999	999	999	999	2	999	2	2	2	99	6/6.0	6/6 to 6/9	6/6.0	6/6 to 6/9	999	999	99	99	999.	999	999.	999.	999.	999.	999	999.	99	yes
20	23	RE	20	2	2	2	2	2	2	2	2	99	7	103	999	2	999	2	999	2	999	999	999	999	999	2	999	2	2	2	99	6/6.0	6/6 to 6/9	6/6.0	6/6 to 6/9	999	999	99	99	999.	999	999.	999.	999.	999.	999	999.	99	yes
21	25	RE	27	2	1	1	2	2	2	2	2	99	7	105	15	2	999	2	999	2	999	999	999	45000	1	1	Hypertension with CKD under hemodialysis	1	2	1	CKD under hemodialysis	6/24.0	<6/18 to 6/60	999	999	999	999	99	99	999.	999	999.	999.	999.	999.	999	999.	99	no
22	26	RE	46	4	1	2	2	2	2	2	2	99	4	102	999	2	999	2	999	2	999	999	999	116000	2	1	Hypertension with old CRVO	1	2	1	old LE CRVO	6/9.0	6/6 to 6/9	6/6	6/6 to 6/9	999	999	99	99	999.	999	999.	999.	999.	999.	999	999.	99	yes
23	27	RE	24	2	1	1	2	2	2	2	2	99	999	999	999	2	999	2	999	2	999	999	999	999	999	2	999	2	2	2	99	CFCF	<3/60	CFCF	<3/60	999	999	99	99	999.	999	999.	999.	hemorrhage, pigmentary changes	999.	999	999.	99	yes
24	28	RE	37	3	1	2	2	2	2	2	2	99	3	102	7	2	999	2	999	2	999	999	999	999	999	2	999	2	2	2	99	6/6.0	6/6 to 6/9	6/6.0	6/6 to 6/9	999	999	99	99	999.	999	999.	999.	999.	999.	999	999.	99	no
25	29	RE	76	6	1	1	2	2	2	2	2	99	999	999	17	2	999	2	999	2	999	999	999	less than 150000	2	1	WET AMD	2	2	1	BE WET AMD	6/24.0	<6/18 to 6/60	6/24.0	<6/18 to 6/60	999	999	99	99	999.	999	999.	999.	macular edema	337 CMT	999	999.	99	yes
26	30	RE	14	1	2	1	2	2	2	2	1	99	999	999	10	2	999	2	999	2	999	999	999	999	999	2	999	2	2	2	99	6/60.0	<6/18 to 6/60	6/36.0	<6/18 to 6/60	999	999	99	99	999.	999	999.	999.	foveolitis (pigmentary changes)	999.	999	999.	99	yes
27	31	RE	32	3	2	1	2	2	2	1	2	99	2	102	6	1	999	2	999	2	999	999	999	999	999	2	999	2	2	2	99	6/60.0	<6/18 to 6/60	6/60.0	<6/18 to 6/60	999	999	99	99	999.	999	999.	999.	RPE changes	999.	999	999.	99	no
28	32	RE	59	5	2	2	2	2	2	2	2	99	1	104	60	2	999	2	999	2	999	999	999	999	999	2	999	2	2	2	99	6/24.0	<6/18 to 6/60	6/9.0	6/6 to 6/9	999	999	99	99	999.	999	999.	999.	retinal hemorrhages	999.	999	999.	99	yes
29	33	RE	36	3	2	1	2	2	2	2	2	99	999	999	999	2	999	2	999	2	999	999	999	999	999	2	999	2	2	2	99	6/6.0	6/6 to 6/9	6/6.0	6/6 to 6/9	999	999	99	99	999.	999	999.	999.	retinal hemorrhage,exudates	999.	999	999.	99	yes
30	34	RE	32	3	1	1	2	2	2	2	2	99	999	999	999	2	999	2	999	2	999	999	999	999	999	1	Hypertension with hypertensive nephropathy under maintenance hemodialysis	1	2	1	hypertensive nephropathy under maintenance hemodialysis	6/60.0	<6/18 to 6/60	6/36.0	<6/18 to 6/60	999	999	99	99	999.	999	999.	999.	macular edema	SRF	999	999.	99	no
31	35	RE	54	5	2	1	2	2	2	2	2	99	999	999	999	2	999	2	999	2	999	999	999	999	999	2	999	2	2	2	99	999	999	999	999	999	999	99	99	999.	999	999.	999.	999.	999.	999	999.	99	no
32	36	RE	58	5	2	2	2	2	2	2	2	99	4	101	10	2	999	2	999	2	999	999	999	188000	2	1	Hypertension	1	2	2	99	6/9.0	6/6 to 6/9	6/6.0	6/6 to 6/9	14	999	99	99	999.	999	999.	999.	999.	999.	999	999.	99	no
33	37	RE	21	2	2	1	2	2	2	2	2	99	999	999	999	2	999	2	999	2	999	999	999	999	999	1	chemotherapy for breast cancer	2	2	1	chemotherapy for breast cancer	1/60.0	<3/60	1/60.0	<3/60	999	999	99	99	999.	999	999.	999.	macular edema and pre-retinal hemorrhages	999.	999	999.	99	no
34	38	RE	19	2	2	2	2	2	2	2	2	99	999	999	999	2	999	2	999	2	999	999	999	999	999	2	999	2	2	2	99	6/6.0	6/6 to 6/9	6/6.0	6/6 to 6/9	999	999	99	99	999.	999	999.	999.	999.	999.	999	999.	99	yes
35	39	RE	16	1	2	2	2	2	2	2	2	99	999	999	999	2	999	2	999	2	999	999	999	999	999	2	999	2	2	2	99	6/9.0	6/6 to 6/9	6/6.0	6/6 to 6/9	15	999	99	99	999.	999	999.	999.	999.	999.	999	999.	99	yes
36	40	RE	54	5	1	1	2	22	2	2	2	2	4	102	10	2	999	2	999	2	999	999	999	177000	2	2	999	2	2	2	99	6/18	<6/9 to 6/18	6/9	6/6 to 6/9	999	999	99	99	999	999	999	non-ischemic CRVO	999	999	999	999	99	99
37	1	LE	9999	9999	9999	1	2	2	2	2	2	99	99	99	99	99	99	99	99	99	99	99	99	99	99	2	999	99	99	99	99	6/9.0	6/6 to 6/9	6/9.0	6/6 to 6/9	99	99	99	99	99.	99	99.	99.	present	cystoid changes	999	999.	99	99
38	2	LE	9999	9999	9999	1	2	2	2	2	2	99	99	99	99	99	99	99	99	99	99	99	99	99	99	2	999	99	99	99	99	6/60.0	<6/18 to 6/60	6/60.0	<6/18 to 6/60	99	99	99	99	99.	99	99.	99.	present	normal	999	999.	99	99
39	3	LE	9999	9999	9999	1	2	2	2	2	2	99	99	99	99	99	99	99	99	99	99	99	99	99	99	2	999	99	99	99	99	6/18.0	<6/9 to 6/18	6/18.0	<6/9 to 6/18	99	99	99	2+	99.	99	99.	99.	foveal exudates	999.	999	999.	99	99
40	4	LE	9999	9999	9999	2	2	2	2	2	2	99	99	99	99	99	99	99	99	99	99	99	99	99	99	2	999	99	99	99	99	6/6.0	6/6 to 6/9	6/6.0	6/6 to 6/9	99	99	99	99	99.	99	99.	99.	hemorrhages	normal	999	999.	99	99
41	5	LE	9999	9999	9999	2	2	2	2	2	2	99	99	99	99	99	99	99	99	99	99	99	99	99	99	2	999	99	99	99	99	6/12.0	<6/9 to 6/18	6/9.0	6/6 to 6/9	20	99	99	99	99.	99	99.	99.	999.	999.	999	999.	99	99
42	6	LE	9999	9999	9999	2	2	2	2	2	2	99	99	99	99	99	99	99	99	99	99	99	99	99	99	2	999	99	99	99	99	999	999	999	999	99	99	99	99	99.	99	99.	99.	999.	999.	999	999.	99	99
43	7	LE	9999	9999	9999	1	2	2	2	99	99	99	99	99	99	99	99	99	99	99	99	99	99	99	99	2	999	99	99	99	99	6/18.0	<6/9 to 6/18	6/18.0	<6/9 to 6/18	18	99	1+	99	99.	99	99.	non ischaemic ST BRVO	999.	999.	999	999.	99	99
44	8	LE	9999	9999	9999	1	2	2	2	2	2	2	99	99	99	99	99	99	99	99	99	99	99	99	99	2	999	99	99	99	99	3/60.0	<6/60 to 3/60	3/60.0	<6/60 to 3/60	15	99	99	99	99.	99	99.	99.	foveolitis	999.	999	normal	99	99
45	9	LE	9999	9999	9999	1	2	2	2	99	2	99	99	99	99	99	99	99	99	99	99	99	99	99	99	2	999	99	99	99	99	6/60.0	<6/18 to 6/60	6/18.0	<6/9 to 6/18	99	99	99	99	present	99	99.	99.	999.	999.	999	999.	99	99
46	11	LE	9999	9999	9999	1	2	2	2	2	2	99	99	99	99	99	99	99	99	99	99	99	99	99	99	2	999	99	99	99	99	6/24.0	<6/18 to 6/60	6/24.0	<6/18 to 6/60	15	99	99	99	99.	99	99.	99.	macular hemorrhage	999.	999	999.	99	99
47	12	LE	9999	9999	9999	1	2	2	2	2	2	99	99	99	99	99	99	99	99	99	99	99	99	99	99	2	999	99	99	99	99	6/36.0	<6/18 to 6/60	6/36.0	<6/18 to 6/60	99	99	99	99	99.	99	99.	99.	macular hemorrhage	999.	999	999.	99	99
48	13	LE	9999	9999	9999	1	2	2	2	2	2	99	99	99	99	99	99	99	99	99	99	99	99	99	99	2	999	99	99	99	99	6/9.0	6/6 to 6/9	6/6.0	6/6 to 6/9	99	99	99	99	99.	99	99.	99.	blot hemorrhage	999.	999	999.	99	99
49	14	LE	9999	9999	9999	2	2	2	2	2	2	99	99	99	99	99	99	99	99	99	99	99	99	99	99	2	999	99	99	99	99	6/6.0	6/6 to 6/9	999	999	20	99	99	99	99.	99	99.	99.	999.	999.	999	999.	99	99
50	17	LE	9999	9999	9999	1	2	2	2	2	2	99	99	99	99	99	99	99	99	99	99	99	99	99	99	2	999	99	99	99	99	6/36.0	<6/18 to 6/60	6/36.0	<6/18 to 6/60	99	99	99	99	99.	99	99.	99.	hemorrhages, macular edema	macular edema	999	999.	99	99
51	18	LE	9999	9999	9999	2	2	2	2	2	2	99	99	99	99	99	99	99	99	99	99	99	99	99	99	2	999	99	99	99	99	999	999	999	999	99	99	99	99	99.	99	99.	99.	999.	999.	999	999.	99	99
52	19	LE	9999	9999	9999	1	2	2	2	2	2	99	99	99	99	99	99	99	99	99	99	99	99	99	99	2	999	99	99	99	99	999	999	999	999	99	99	99	99	99.	99	99.	99.	999.	999.	999	999.	99	99
53	20	LE	9999	9999	9999	1	2	2	2	2	2	99	99	99	99	99	99	99	99	99	99	99	99	99	99	2	999	99	99	99	99	6/24.0	<6/18 to 6/60	6/18.0	<6/9 to 6/18	99	99	99	99	99.	99	99.	99.	yes	999.	999	999.	99	99
54	21	LE	9999	9999	9999	2	2	2	2	2	2	99	99	99	99	99	99	99	99	99	99	99	99	99	99	2	999	99	99	99	99	6/6.0	6/6 to 6/9	6/6.0	6/6 to 6/9	99	99	99	99	99.	99	99.	99.	999.	999.	999	999.	99	99
55	22	LE	9999	9999	9999	1	2	2	2	2	2	99	99	99	99	99	99	99	99	99	99	99	99	99	99	2	999	99	99	99	99	3/60.0	<6/60 to 3/60	6/36.0	<6/18 to 6/60	99	99	99	99	99.	99	99.	99.	foveolitis	999.	999	999.	99	99
56	23	LE	9999	9999	9999	1	2	2	2	2	2	99	99	99	99	99	99	99	99	99	99	99	99	99	99	2	999	99	99	99	99	CF at 50cm	<3/60	CF at 50cm	<3/60	99	99	99	99	99.	99	99.	99.	macular hemorrhage	999.	999	999.	99	99
57	25	LE	9999	9999	9999	2	2	2	2	2	2	99	99	99	99	99	99	99	99	99	99	99	99	99	99	2	999	99	99	99	99	CFCF	<3/60	<3/60	<3/60	99	99	99	99	99.	99	99.	99.	999.	999.	999	999.	99	99
58	26	LE	9999	9999	9999	1	2	2	2	2	2	99	99	99	99	99	99	99	99	99	99	99	99	99	99	2	999	99	99	99	99	CF 1m	<3/60	CF1m	<3/60	99	99	99	99	99.	99	99.	99.	dengue associated retinopathy	999.	999	999.	99	99
59	27	LE	9999	9999	9999	1	2	2	2	2	2	99	99	99	99	99	99	99	99	99	99	99	99	99	99	2	999	99	99	99	99	6/24.0	<6/18 to 6/60	6/24.0	<6/18 to 6/60	99	99	99	99	99.	99	99.	99.	pigmentary changes	999.	999	999.	99	99
60	28	LE	9999	9999	9999	1	2	2	2	2	2	99	99	99	99	99	99	99	99	99	99	99	99	99	99	2	999	99	99	99	99	6/9.0	6/6 to 6/9	6/9.0	6/6 to 6/9	99	99	99	99	99.	99	99.	99.	retinal hemorrhages	999.	999	999.	99	99
61	29	LE	9999	9999	9999	1	2	2	2	2	2	99	99	99	99	99	99	99	99	99	99	99	99	99	99	2	999	99	99	99	99	6/24.0	<6/18 to 6/60	6/24.0	<6/18 to 6/60	99	99	99	99	99.	99	99.	99.	macular edema	983 CMT	999	999.	99	99
62	30	LE	9999	9999	9999	2	2	2	2	2	2	99	99	99	99	99	99	99	99	99	99	99	99	99	99	2	999	99	99	99	99	6/6.0	6/6 to 6/9	6/6.0	6/6 to 6/9	99	99	99	99	99.	99	99.	99.	999.	999.	999	999.	99	99
63	31	LE	9999	9999	9999	2	2	2	2	2	2	99	99	99	99	99	99	99	99	99	99	99	99	99	99	2	999	99	99	99	99	6/6.0	6/6 to 6/9	6/6.0	6/6 to 6/9	99	99	99	99	99.	99	99.	99.	999.	999.	999	999.	99	99
64	32	LE	9999	9999	9999	2	2	2	2	2	2	99	99	99	99	99	99	99	99	99	99	99	99	99	99	2	999	99	99	99	99	6/24.0	<6/18 to 6/60	6/9.0	6/6 to 6/9	99	99	99	99	99.	99	99.	99.	retinal hemorrhages	999.	999	999.	99	99
65	33	LE	9999	9999	9999	1	2	2	2	2	2	99	99	99	99	99	99	99	99	99	99	99	99	99	99	2	999	99	99	99	99	6/6.0	6/6 to 6/9	6/6.0	6/6 to 6/9	99	99	99	99	99.	99	99.	99.	retinal hemorrhage,exudates	999.	999	999.	99	99
66	34	LE	9999	9999	9999	1	2	2	2	2	2	99	99	99	99	99	99	99	99	99	99	99	99	99	99	2	999	99	99	99	99	3/60.0	<6/60 to 3/60	3/60.0	<6/60 to 3/60	99	99	99	99	99.	99	99.	99.	macular edema	SRF	999	999.	99	99
67	35	LE	9999	9999	9999	2	2	2	2	2	2	99	99	99	99	99	99	99	99	99	99	99	99	99	99	2	999	99	99	99	99	999	999	999	999	99	99	99	99	99.	99	99.	99.	999.	999.	999	999.	99	99
68	36	LE	9999	9999	9999	1	2	2	2	2	2	99	99	99	99	99	99	99	99	99	99	99	99	99	99	2	999	99	99	99	99	6/36.0	<6/18 to 6/60	6/36.0	<6/18 to 6/60	15	99	99	99	99.	99	99.	99.	macular edema, retinal hemorrhage (?STBRVO)	999.	999	999.	99	99
69	37	LE	9999	9999	9999	2	2	2	2	2	2	99	99	99	99	99	99	99	99	99	99	99	99	99	99	2	999	99	99	99	99	1/60.0	<3/60	6/60.0	<6/18 to 6/60	99	99	99	99	99.	99	99.	99.	pre-retinal hemorrhage	999.	999	999.	99	99
70	38	LE	9999	9999	9999	1	2	2	2	2	2	99	99	99	99	99	99	99	99	99	99	99	99	99	99	2	999	99	99	99	99	6/12.0	<6/9 to 6/18	6/12.0	<6/9 to 6/18	99	99	99	99	99.	99	99.	99.	RPE changes	999.	999	999.	99	99
71	39	LE	9999	9999	9999	1	2	2	2	1	2	99	99	99	99	99	99	99	99	99	99	99	99	99	99	2	999	99	99	99	99	6/9.0	6/6 to 6/9	6/6.0	6/6 to 6/9	16	99	99	99	99.	99	AMNR	99.	AMNR	999.	999	999.	99	99
72	40	LE	9999	9999	9999	1	2	2	2	2	2	2	99	99	99	99	99	99	99	99	99	99	99	99	99	2	99	99	99	99	99	6/18	<6/9 to 6/18	6/9	6/6 to 6/9	99	99	99	99	99	99	99	non-ischemic CRVO	999	999	999	999	99	99
[truncated: 39 more columns]

## Sheet: Sheet1
	999	Missing
	Sex
	2	Female
	1	Male
	DOV_OU
	Photophobia_OU
	ocularpain_OU
	Redness_OU
	Scotoma_OU
	Floaters_OU
	1	Yes
	2	No
